# Supplementary material
Source: PubMed Central journal article supplement (PMC8620346)
Supplement: NIHMS1060422-supplement-online_index.pdf [file NIHMS1060422-supplement-online_index.pdf]

# Online Appendix on Asymptotic Variances for “Estimating the decision curve and its precision from three study designs”

by Ruth M. Pfeiffer and Mitchell H. Gail

Under regularity conditions given in (van der Vaart, 1998), and letting  $F_s = (1 - s)F + s\delta_r$  and  $\delta_r$  denote the point mass at the point  $r$ , the influence function  $\psi(r)$  for a statistic  $T$  that is viewed as a functional of the distribution function  $F$ , can be computed as the derivative

$$\psi(r) = \frac{d}{ds}T(F_s)|_{s=0}.$$

## 1. Asymptotic variance of $\widehat{\text{NB}}_R$ in (10) estimated using observed risks when the risk model is well calibrated:

We compute the influence functions for the following functionals of  $F$ :  $T_1(F) = \int_t^\infty s dF(s)$  and  $T_2(F) = F(t)$  to obtain the influence function

$$\psi^R(r) = \{1/(1-t)\}\{rI(r > t) - \int_t^\infty s dF(s)\} - \{t/(1-t)\}\{I(r > t) - \int_t^\infty dF(s)\} \quad (1)$$

$E\psi^R(r) = 0$ , as  $E\{rI(r > t)\} = \int_t^\infty s dF(s)$  and  $E\{I(r > t)\} = \int_t^\infty dF(s)$ . The variance is given by

$$\begin{aligned} E\{\psi^R(r)\}^2 &= \{1/(1-t)\}^2 \left\{ \int_t^\infty s^2 dF(s) - \left( \int_t^\infty s dF(s) \right)^2 \right\} + \{t/(1-t)\}^2 F(t)[1 - F(t)] \\ &\quad - 2\{t/(1-t)\}^2 F(t) \int_t^\infty s dF(s), \end{aligned}$$

and estimated using the empirical distribution function  $F_N$ ,  $S_{[t]}$  and  $S_2[t] = 1/N \sum_{j=1}^{[t]} r_{(j)}^2$ .

## 2. Asymptotic variance of $\widehat{\text{NB}}_{cc}(t)$ in (11) estimated from case-control data when $\mu = P(Y = 1)$ is known

We utilize a partial influence function approach (Pires and Branco, 2002) to derive the asymptotic properties of functionals  $T(K_n, G_m)$  of two empirical distribution functions,  $K_n$  and  $G_m$ , estimated from the independent samples  $r_i \sim K, i = 1, \dots, n$  and  $r_j \sim G, j = 1, \dots, m$  and  $N = m + n$ . A first order approximation of  $T$  yields

$$T(K_n, G_m) \approx T(K, G) + \sum_i \psi_K(r_i)/n + \sum_j \psi_G(r_j)/m. \quad (2)$$

The partial influence functions  $\psi_K$  and  $\psi_G$  are independent with  $E_K \psi_G(r) = 0$  and  $E_G \psi_K(r) = 0$ . Again, under regularity conditions the remainder term in the linearization is of the order  $o(N^{-1})$  and, letting  $\lambda = n/N$ ,  $\sqrt{N}(T(K_n, G_m) - T(K, G)) \rightarrow N(0, \text{var}\{T(K, G)\})$  with

$$\text{var}\{T(K, G)\} = \lambda^{-1} E_K \{\psi_K(r)\}^2 + (1 - \lambda)^{-1} E_G \{\psi_G(r)\}^2. \quad (3)$$

Letting  $K_s(r) = (1-s)K(r) + s\delta_r$ , we compute the influence function  $\psi_0$  for  $T(K_s, G)$  as  $\psi_K = \frac{d}{ds} \text{NB}(K_s, G)|_{s=0} = -\{t/(1-t)\}(1-\mu)\{I(r > t) - 1 + K(t)\}$ . Similarly, for  $G_s(r) = (1-s)G + s\delta_r$  we derive  $\psi_G = \frac{d}{ds} \text{NB}(K, G_s)|_{s=0} = \mu\{I(r > t) - 1 + G(t)\}$ . Thus the influence function for NB is

$$\psi^{cc}(r) = (1 - \lambda)^{-1} \psi_G(r) + \lambda^{-1} \psi_K(r).$$

When computing the variance of  $\widehat{\text{NB}}_{cc}$  based on the influences,  $G$ ,  $K$  and  $\lambda$  are replaced by their empirical estimates in cases and controls, respectively. The needed terms in (3) are  $E_K\{\psi_K(r)\}^2 = \{t/(1-t)\}^2(1-\mu)^2K(t)(1-K(t))$  and  $E_G\{\psi_G(r)\}^2 = \mu^2G(t)(1-G(t))$ , leading to

$$E\{\psi^{cc}(r)\}^2 = (1-\lambda)^{-2}\mu^2G(t)(1-G(t)) + \lambda^{-2}\{t/(1-t)\}^2(1-\mu)^2K(t)(1-K(t)). \quad (4)$$

### 3. Asymptotic variance of $\widehat{\text{NB}}_{RY}(t)$ in (12) estimated using risks and outcomes in a population

Here we observe  $(r_i^F, y_i)$ ,  $i = 1, \dots, N$  of risks and associated outcomes in a population, that are realizations of the bivariate random variable  $(R, Y) \sim F(r, y) = P(R \leq r, Y = y)$ , i.e.  $F(r, y)$  is a distribution with point mass at  $y = 0, 1$ . We now treat  $\widehat{\text{NB}}$  as a continuous functional of the bivariate empirical function

$$F_N(t, y^*) = \frac{1}{N} \sum_{i=1}^N I(r_i \leq t, y_i = y^*).$$

Based on similar linearization arguments as used for the earlier derivations, we obtain that  $\widehat{\text{NB}}$  based on  $(r^F, y)$  is asymptotically normally distributed with variance obtained from the bivariate influence function

$$\psi^{\text{NB}}(r, y) = \left\{ I(r > t, y = 1) - 1 + F(t, y = 1) \right\} - \{t/(1-t)\} \left\{ I(r > t, y = 0) - 1 + F(t, y = 0) \right\}$$

It is easy to see that  $E\psi^{\text{NB}}(r, y) = 0$ . Thus

$$E_F\{\psi^{\text{NB}}(r, y)\}^2 = F(t, y = 1)\{1 - F(t, y = 1)\} + \{t/(1-t)\}^2 F(t, y = 0)\{1 - F(t, y = 0)\} \\ - 2\{t/(1-t)\}F(t, y = 1)F(t, y = 0),$$

which can be estimated by the respective empirical distributions.

The above expression for the variance of NB can also be obtained by viewing the bivariate outcome  $(R, Y = i)$ ,  $i = 0, 1$ , as arising from a multinomial distribution based on a  $2 \times 2$  table corresponding to the events  $Y = 0$  and  $Y = 1$  and  $R \leq t$  and  $R > t$ .

## References

- A. Pires and J. Branco. Partial influence functions. *Journal of Multivariate Analysis*, 83(2):451–468, 2002.
- A. van der Vaart. *Asymptotic Statistics*. Cambridge Series in Statistical and Probabilistic Mathematics. Cambridge University Press, Cambridge, 1998.
